# Supplementary material
Source: PubMed Central journal article supplement (PMC8505223)
Supplement: 12144_2021_2372_MOESM1_ESM.pdf [file 12144_2021_2372_MOESM1_ESM.pdf]

# Results

## IRI EC

### Model Comparison

| Models                                                                                                                                                                                                                                                                                                     | P(M)         | P(M data)    | BF <sub>M</sub> | Log(BF <sub>10</sub> ) | R <sup>2</sup> |
|------------------------------------------------------------------------------------------------------------------------------------------------------------------------------------------------------------------------------------------------------------------------------------------------------------|--------------|--------------|-----------------|------------------------|----------------|
| <b>mfq_hc + mfq_ar</b>                                                                                                                                                                                                                                                                                     | <b>0.250</b> | <b>0.881</b> | <b>22.184</b>   | <b>0.000</b>           | <b>0.393</b>   |
| mfq_hc                                                                                                                                                                                                                                                                                                     | 0.125        | 0.119        | 0.947           | -1.308                 | 0.382          |
| Null model (incl. SEX.f, calc_ses, RACE.f_6, RACE.f_2, RACE.f_8, RACE.f_4, RACE.f_3, OCCUPATION.f_10, OCCUPATION.f_2, OCCUPATION.f_3, OCCUPATION.f_11, OCCUPATION.f_6, OCCUPATION.f_5, OCCUPATION.f_7, OCCUPATION.f_8, OCCUPATION.f_9, OCCUPATION.f_4, political_2, political_6, political_4, political_5) | 0.250        | 6.638e-24    | 1.991e-23       | -53.242                | 0.080          |
| Null model (incl. SEX.f, calc_ses, RACE.f_6, RACE.f_2, RACE.f_8, RACE.f_4, RACE.f_3, OCCUPATION.f_10, OCCUPATION.f_2, OCCUPATION.f_3, OCCUPATION.f_11, OCCUPATION.f_6, OCCUPATION.f_5, OCCUPATION.f_7, OCCUPATION.f_8, OCCUPATION.f_9, OCCUPATION.f_4, political_2, political_6, political_4, political_5) | 0.250        | 6.638e-24    | 1.991e-23       | -53.242                | 0.080          |
| mfq_ar                                                                                                                                                                                                                                                                                                     | 0.125        | 2.605e-24    | 1.824e-23       | -53.485                | 0.084          |

*Note.* All models include SEX.f, calc\_ses, RACE.f\_6, RACE.f\_2, RACE.f\_8, RACE.f\_4, RACE.f\_3, OCCUPATION.f\_10, OCCUPATION.f\_2, OCCUPATION.f\_3, OCCUPATION.f\_11, OCCUPATION.f\_6, OCCUPATION.f\_5, OCCUPATION.f\_7, OCCUPATION.f\_8, OCCUPATION.f\_9, OCCUPATION.f\_4, political\_2, political\_6, political\_4, political\_5.

## Posterior Summary

### Posterior Summaries of Coefficients

| Coefficient     | Mean          | SD           | P(incl)      | P(incl data) | Log(BF <sub>inclusion</sub> ) | 95% Credible Interval |               |
|-----------------|---------------|--------------|--------------|--------------|-------------------------------|-----------------------|---------------|
|                 |               |              |              |              |                               | Lower                 | Upper         |
| Intercept       | 26.497        | 0.282        | 1.000        | 1.000        | 0.000                         | 25.942                | 27.051        |
| <b>mfq_hc</b>   | <b>0.638</b>  | <b>0.054</b> | <b>0.375</b> | <b>1.000</b> | <b>53.008</b>                 | <b>0.532</b>          | <b>0.744</b>  |
| <b>mfq_ar</b>   | <b>-0.094</b> | <b>0.042</b> | <b>0.375</b> | <b>0.881</b> | <b>2.512</b>                  | <b>-0.177</b>         | <b>-0.011</b> |
| SEX.f           | 0.377         | 0.568        | 1.000        | 1.000        | 0.000                         | -0.739                | 1.494         |
| calc_ses        | -0.320        | 0.183        | 1.000        | 1.000        | 0.000                         | -0.679                | 0.040         |
| RACE.f_6        | -0.373        | 1.775        | 1.000        | 1.000        | 0.000                         | -3.864                | 3.119         |
| RACE.f_2        | -0.178        | 1.036        | 1.000        | 1.000        | 0.000                         | -2.216                | 1.860         |
| RACE.f_8        | 1.010         | 1.307        | 1.000        | 1.000        | 0.000                         | -1.561                | 3.581         |
| RACE.f_4        | -1.945        | 1.601        | 1.000        | 1.000        | 0.000                         | -5.095                | 1.205         |
| RACE.f_3        | 2.959         | 4.954        | 1.000        | 1.000        | 0.000                         | -6.788                | 12.705        |
| OCCUPATION.f_10 | 0.792         | 1.089        | 1.000        | 1.000        | 0.000                         | -1.351                | 2.935         |
| OCCUPATION.f_2  | -0.401        | 0.916        | 1.000        | 1.000        | 0.000                         | -2.202                | 1.401         |
| OCCUPATION.f_3  | -0.817        | 0.809        | 1.000        | 1.000        | 0.000                         | -2.409                | 0.775         |
| OCCUPATION.f_11 | 0.401         | 0.891        | 1.000        | 1.000        | 0.000                         | -1.352                | 2.154         |
| OCCUPATION.f_6  | -0.270        | 1.495        | 1.000        | 1.000        | 0.000                         | -3.212                | 2.672         |
| OCCUPATION.f_5  | -2.359        | 1.515        | 1.000        | 1.000        | 0.000                         | -5.338                | 0.621         |
| OCCUPATION.f_7  | -0.189        | 2.501        | 1.000        | 1.000        | 0.000                         | -5.109                | 4.730         |

|                |        |       |       |       |       |        |        |
|----------------|--------|-------|-------|-------|-------|--------|--------|
| OCCUPATION.f_7 | 0.160  | 2.551 | 1.000 | 1.000 | 0.000 | -3.160 | 1.760  |
| OCCUPATION.f_8 | -0.401 | 1.585 | 1.000 | 1.000 | 0.000 | -3.520 | 2.717  |
| OCCUPATION.f_9 | 4.153  | 2.860 | 1.000 | 1.000 | 0.000 | -1.473 | 9.779  |
| OCCUPATION.f_4 | 4.704  | 4.918 | 1.000 | 1.000 | 0.000 | -4.971 | 14.379 |
| political_2    | -0.693 | 0.717 | 1.000 | 1.000 | 0.000 | -2.104 | 0.719  |
| political_6    | -0.578 | 0.914 | 1.000 | 1.000 | 0.000 | -2.376 | 1.219  |
| political_4    | -0.484 | 1.554 | 1.000 | 1.000 | 0.000 | -3.541 | 2.572  |
| political_5    | 2.577  | 2.590 | 1.000 | 1.000 | 0.000 | -2.518 | 7.672  |

## IRI PT

### Model Comparison

| Models                                                                                                                                                                                                                                                                                    | P(M)         | P(M data)    | BF <sub>M</sub>  | Log(BF <sub>10</sub> ) | R <sup>2</sup> |
|-------------------------------------------------------------------------------------------------------------------------------------------------------------------------------------------------------------------------------------------------------------------------------------------|--------------|--------------|------------------|------------------------|----------------|
| <b>mfq_hc</b>                                                                                                                                                                                                                                                                             | <b>0.500</b> | <b>1.000</b> | <b>1.406e+12</b> | <b>0.000</b>           | <b>0.242</b>   |
| Null model (incl. RACE.f_6, RACE.f_2, RACE.f_8, RACE.f_4, RACE.f_3, OCCUPATION.f_10, OCCUPATION.f_2, OCCUPATION.f_3, OCCUPATION.f_11, OCCUPATION.f_6, OCCUPATION.f_5, OCCUPATION.f_7, OCCUPATION.f_8, OCCUPATION.f_9, OCCUPATION.f_4, political_2, political_6, political_4, political_5) | 0.500        | 7.114e-13    | 7.114e-13        | -27.972                | 0.054          |

*Note.* All models include RACE.f\_6, RACE.f\_2, RACE.f\_8, RACE.f\_4, RACE.f\_3, OCCUPATION.f\_10, OCCUPATION.f\_2, OCCUPATION.f\_3, OCCUPATION.f\_11, OCCUPATION.f\_6, OCCUPATION.f\_5, OCCUPATION.f\_7, OCCUPATION.f\_8, OCCUPATION.f\_9, OCCUPATION.f\_4, political\_2, political\_6, political\_4, political\_5.

## Posterior Summary

### Posterior Summaries of Coefficients

| Coefficient     | Mean         | SD           | P(incl)      | P(incl data) | Log(BF <sub>inclusion</sub> ) | 95% Credible Interval |              |
|-----------------|--------------|--------------|--------------|--------------|-------------------------------|-----------------------|--------------|
|                 |              |              |              |              |                               | Lower                 | Upper        |
| Intercept       | 26.009       | 0.278        | 1.000        | 1.000        | 0.000                         | 25.463                | 26.555       |
| <b>mfq_hc</b>   | <b>0.418</b> | <b>0.052</b> | <b>0.500</b> | <b>1.000</b> | <b>27.972</b>                 | <b>0.316</b>          | <b>0.519</b> |
| RACE.f_6        | -0.758       | 1.708        | 1.000        | 1.000        | 0.000                         | -4.119                | 2.603        |
| RACE.f_2        | 0.904        | 0.989        | 1.000        | 1.000        | 0.000                         | -1.042                | 2.849        |
| RACE.f_8        | 5.526e-4     | 1.251        | 1.000        | 1.000        | 0.000                         | -2.460                | 2.461        |
| RACE.f_4        | -2.376       | 1.528        | 1.000        | 1.000        | 0.000                         | -5.383                | 0.630        |
| RACE.f_3        | 3.618        | 4.742        | 1.000        | 1.000        | 0.000                         | -5.711                | 12.947       |
| OCCUPATION.f_10 | 0.892        | 1.033        | 1.000        | 1.000        | 0.000                         | -1.140                | 2.923        |
| OCCUPATION.f_2  | 0.248        | 0.842        | 1.000        | 1.000        | 0.000                         | -1.408                | 1.904        |
| OCCUPATION.f_3  | 0.823        | 0.767        | 1.000        | 1.000        | 0.000                         | -0.687                | 2.332        |
| OCCUPATION.f_11 | -0.663       | 0.845        | 1.000        | 1.000        | 0.000                         | -2.325                | 0.999        |
| OCCUPATION.f_6  | -0.929       | 1.411        | 1.000        | 1.000        | 0.000                         | -3.706                | 1.847        |
| OCCUPATION.f_5  | -0.089       | 1.433        | 1.000        | 1.000        | 0.000                         | -2.907                | 2.729        |
| OCCUPATION.f_7  | 0.377        | 2.402        | 1.000        | 1.000        | 0.000                         | -4.349                | 5.102        |
| OCCUPATION.f_8  | 0.351        | 1.523        | 1.000        | 1.000        | 0.000                         | -2.646                | 3.348        |
| OCCUPATION.f_9  | 2.087        | 2.748        | 1.000        | 1.000        | 0.000                         | -3.318                | 7.492        |
| OCCUPATION.f_4  | 2.987        | 4.712        | 1.000        | 1.000        | 0.000                         | -6.282                | 12.256       |

|             |        |       |       |       |       |        |       |
|-------------|--------|-------|-------|-------|-------|--------|-------|
| political_2 | -0.704 | 0.687 | 1.000 | 1.000 | 0.000 | -2.056 | 0.647 |
| political_6 | -0.154 | 0.878 | 1.000 | 1.000 | 0.000 | -1.881 | 1.573 |
| political_4 | 0.604  | 1.491 | 1.000 | 1.000 | 0.000 | -2.329 | 3.536 |
| political_5 | 0.539  | 2.483 | 1.000 | 1.000 | 0.000 | -4.346 | 5.425 |

## IRI PD

### Model Comparison

| Models                                                                                                                                                                                                                                                                                    | P(M)         | P(M data)    | BF <sub>M</sub> | Log(BF <sub>10</sub> ) | R <sup>2</sup> |
|-------------------------------------------------------------------------------------------------------------------------------------------------------------------------------------------------------------------------------------------------------------------------------------------|--------------|--------------|-----------------|------------------------|----------------|
| <b>mfq_igl</b>                                                                                                                                                                                                                                                                            | <b>0.500</b> | <b>0.975</b> | <b>38.245</b>   | <b>0.000</b>           | <b>0.077</b>   |
| Null model (incl. RACE.f_6, RACE.f_2, RACE.f_8, RACE.f_4, RACE.f_3, OCCUPATION.f_10, OCCUPATION.f_2, OCCUPATION.f_3, OCCUPATION.f_11, OCCUPATION.f_6, OCCUPATION.f_5, OCCUPATION.f_7, OCCUPATION.f_8, OCCUPATION.f_9, OCCUPATION.f_4, political_2, political_6, political_4, political_5) | 0.500        | 0.025        | 0.026           | -3.644                 | 0.043          |

*Note.* All models include RACE.f\_6, RACE.f\_2, RACE.f\_8, RACE.f\_4, RACE.f\_3, OCCUPATION.f\_10, OCCUPATION.f\_2, OCCUPATION.f\_3, OCCUPATION.f\_11, OCCUPATION.f\_6, OCCUPATION.f\_5, OCCUPATION.f\_7, OCCUPATION.f\_8, OCCUPATION.f\_9, OCCUPATION.f\_4, political\_2, political\_6, political\_4, political\_5.

## Posterior Summary

### Posterior Summaries of Coefficients

| Coefficient     | Mean         | SD           | P(incl)      | P(incl data) | Log(BF <sub>inclusion</sub> ) | 95% Credible Interval |              |
|-----------------|--------------|--------------|--------------|--------------|-------------------------------|-----------------------|--------------|
|                 |              |              |              |              |                               | Lower                 | Upper        |
| Intercept       | 17.942       | 0.369        | 1.000        | 1.000        | 0.000                         | 17.215                | 18.669       |
| <b>mfq_igl</b>  | <b>0.160</b> | <b>0.055</b> | <b>0.500</b> | <b>0.975</b> | <b>3.644</b>                  | <b>0.053</b>          | <b>0.268</b> |
| RACE.f_6        | -0.380       | 2.154        | 1.000        | 1.000        | 0.000                         | -4.616                | 3.857        |
| RACE.f_2        | 0.710        | 1.247        | 1.000        | 1.000        | 0.000                         | -1.743                | 3.163        |
| RACE.f_8        | 2.275        | 1.587        | 1.000        | 1.000        | 0.000                         | -0.846                | 5.397        |
| RACE.f_4        | 1.613        | 1.931        | 1.000        | 1.000        | 0.000                         | -2.186                | 5.411        |
| RACE.f_3        | -1.164       | 6.005        | 1.000        | 1.000        | 0.000                         | -12.977               | 10.649       |
| OCCUPATION.f_10 | 1.057        | 1.301        | 1.000        | 1.000        | 0.000                         | -1.503                | 3.617        |
| OCCUPATION.f_2  | -0.814       | 1.064        | 1.000        | 1.000        | 0.000                         | -2.907                | 1.279        |
| OCCUPATION.f_3  | -1.187       | 0.970        | 1.000        | 1.000        | 0.000                         | -3.095                | 0.722        |
| OCCUPATION.f_11 | -0.381       | 1.062        | 1.000        | 1.000        | 0.000                         | -2.471                | 1.708        |
| OCCUPATION.f_6  | -0.481       | 1.794        | 1.000        | 1.000        | 0.000                         | -4.011                | 3.048        |
| OCCUPATION.f_5  | -1.442       | 1.822        | 1.000        | 1.000        | 0.000                         | -5.027                | 2.143        |
| OCCUPATION.f_7  | -1.300       | 3.036        | 1.000        | 1.000        | 0.000                         | -7.273                | 4.673        |
| OCCUPATION.f_8  | -0.054       | 1.904        | 1.000        | 1.000        | 0.000                         | -3.800                | 3.693        |
| OCCUPATION.f_9  | 2.558        | 3.469        | 1.000        | 1.000        | 0.000                         | -4.266                | 9.383        |
| OCCUPATION.f_4  | -6.997       | 5.945        | 1.000        | 1.000        | 0.000                         | -18.693               | 4.698        |
| political_2     | 0.116        | 0.867        | 1.000        | 1.000        | 0.000                         | -1.589                | 1.821        |
| political_6     | 1.237        | 1.109        | 1.000        | 1.000        | 0.000                         | -0.943                | 3.418        |
| political_4     | 1.668        | 1.884        | 1.000        | 1.000        | 0.000                         | -2.039                | 5.375        |
| political_5     | 0.127        | 3.134        | 1.000        | 1.000        | 0.000                         | -6.039                | 6.292        |

# IRI FS

## Model Comparison

| Models                                                                                                                                                                                                                                                                                    | P(M)         | P(M data)    | BF <sub>M</sub> | Log(BF <sub>10</sub> ) | R <sup>2</sup> |
|-------------------------------------------------------------------------------------------------------------------------------------------------------------------------------------------------------------------------------------------------------------------------------------------|--------------|--------------|-----------------|------------------------|----------------|
| <b>mfq_hc + mfq_igl + mfq_ps</b>                                                                                                                                                                                                                                                          | <b>0.250</b> | <b>0.876</b> | <b>21.109</b>   | <b>0.000</b>           | <b>0.224</b>   |
| mfq_hc + mfq_ps                                                                                                                                                                                                                                                                           | 0.083        | 0.079        | 0.940           | -1.310                 | 0.210          |
| mfq_hc                                                                                                                                                                                                                                                                                    | 0.083        | 0.032        | 0.369           | -2.197                 | 0.199          |
| mfq_hc + mfq_igl                                                                                                                                                                                                                                                                          | 0.083        | 0.013        | 0.148           | -3.090                 | 0.200          |
| mfq_igl + mfq_ps                                                                                                                                                                                                                                                                          | 0.083        | 3.779e-8     | 4.157e-7        | -15.860                | 0.117          |
| Null model (incl. RACE.f_6, RACE.f_2, RACE.f_8, RACE.f_4, RACE.f_3, OCCUPATION.f_10, OCCUPATION.f_2, OCCUPATION.f_3, OCCUPATION.f_11, OCCUPATION.f_6, OCCUPATION.f_5, OCCUPATION.f_7, OCCUPATION.f_8, OCCUPATION.f_9, OCCUPATION.f_4, political_2, political_6, political_4, political_5) | 0.250        | 7.075e-9     | 2.122e-8        | -18.634                | 0.086          |
| mfq_ps                                                                                                                                                                                                                                                                                    | 0.083        | 2.261e-9     | 2.487e-8        | -18.676                | 0.091          |
| mfq_igl                                                                                                                                                                                                                                                                                   | 0.083        | 2.111e-9     | 2.322e-8        | -18.745                | 0.090          |

*Note.* All models include RACE.f\_6, RACE.f\_2, RACE.f\_8, RACE.f\_4, RACE.f\_3, OCCUPATION.f\_10, OCCUPATION.f\_2, OCCUPATION.f\_3, OCCUPATION.f\_11, OCCUPATION.f\_6, OCCUPATION.f\_5, OCCUPATION.f\_7, OCCUPATION.f\_8, OCCUPATION.f\_9, OCCUPATION.f\_4, political\_2, political\_6, political\_4, political\_5.

## Posterior Summary

### Posterior Summaries of Coefficients

| Coefficient     | Mean          | SD           | P(incl)      | P(incl data) | Log(BF <sub>inclusion</sub> ) | 95% Credible Interval |               |
|-----------------|---------------|--------------|--------------|--------------|-------------------------------|-----------------------|---------------|
|                 |               |              |              |              |                               | Lower                 | Upper         |
| Intercept       | 24.122        | 0.313        | 1.000        | 1.000        | 0.000                         | 23.506                | 24.737        |
| <b>mfq_hc</b>   | <b>0.347</b>  | <b>0.058</b> | <b>0.500</b> | <b>1.000</b> | <b>16.827</b>                 | <b>0.232</b>          | <b>0.461</b>  |
| <b>mfq_igl</b>  | <b>0.137</b>  | <b>0.065</b> | <b>0.500</b> | <b>0.889</b> | <b>2.079</b>                  | <b>0.009</b>          | <b>0.266</b>  |
| <b>mfq_ps</b>   | <b>-0.133</b> | <b>0.047</b> | <b>0.500</b> | <b>0.954</b> | <b>3.038</b>                  | <b>-0.226</b>         | <b>-0.040</b> |
| RACE.f_6        | -1.685        | 1.903        | 1.000        | 1.000        | 0.000                         | -5.428                | 2.058         |
| RACE.f_2        | 0.948         | 1.105        | 1.000        | 1.000        | 0.000                         | -1.225                | 3.121         |
| RACE.f_8        | 0.163         | 1.400        | 1.000        | 1.000        | 0.000                         | -2.590                | 2.916         |
| RACE.f_4        | -1.090        | 1.710        | 1.000        | 1.000        | 0.000                         | -4.454                | 2.274         |
| RACE.f_3        | -6.368        | 5.342        | 1.000        | 1.000        | 0.000                         | -16.878               | 4.142         |
| OCCUPATION.f_10 | 0.910         | 1.152        | 1.000        | 1.000        | 0.000                         | -1.356                | 3.176         |
| OCCUPATION.f_2  | 0.225         | 0.941        | 1.000        | 1.000        | 0.000                         | -1.626                | 2.076         |
| OCCUPATION.f_3  | -1.542        | 0.856        | 1.000        | 1.000        | 0.000                         | -3.227                | 0.143         |
| OCCUPATION.f_11 | -2.387        | 0.941        | 1.000        | 1.000        | 0.000                         | -4.238                | -0.536        |
| OCCUPATION.f_6  | -1.859        | 1.589        | 1.000        | 1.000        | 0.000                         | -4.986                | 1.268         |
| OCCUPATION.f_5  | 1.471         | 1.611        | 1.000        | 1.000        | 0.000                         | -1.697                | 4.640         |
| OCCUPATION.f_7  | -1.738        | 2.680        | 1.000        | 1.000        | 0.000                         | -7.010                | 3.535         |
| OCCUPATION.f_8  | -1.630        | 1.699        | 1.000        | 1.000        | 0.000                         | -4.971                | 1.712         |
| OCCUPATION.f_9  | 3.275         | 3.061        | 1.000        | 1.000        | 0.000                         | -2.748                | 9.297         |
| OCCUPATION.f_4  | -9.944        | 5.252        | 1.000        | 1.000        | 0.000                         | -20.275               | 0.388         |
| political_2     | 1.014         | 0.765        | 1.000        | 1.000        | 0.000                         | -0.491                | 2.519         |
| political_6     | 0.019         | 0.978        | 1.000        | 1.000        | 0.000                         | -1.904                | 1.942         |
| political_4     | -2.196        | 1.664        | 1.000        | 1.000        | 0.000                         | -5.469                | 1.076         |

political\_5

2.398

2.767

1.000

1.000

0.000

-3.045

7.842

## MIS INT

### Model Comparison

| Models                                                                                                                                                                                                                                                                                    | P(M)         | P(M data)    | BF <sub>M</sub>  | Log(BF <sub>10</sub> ) | R <sup>2</sup> |
|-------------------------------------------------------------------------------------------------------------------------------------------------------------------------------------------------------------------------------------------------------------------------------------------|--------------|--------------|------------------|------------------------|----------------|
| <b>mfq_hc + mfq_igl</b>                                                                                                                                                                                                                                                                   | <b>0.333</b> | <b>1.000</b> | <b>41152.555</b> | <b>0.000</b>           | <b>0.276</b>   |
| mfq_hc                                                                                                                                                                                                                                                                                    | 0.167        | 4.860e -5    | 2.430e -4        | -9.239                 | 0.219          |
| mfq_igl                                                                                                                                                                                                                                                                                   | 0.167        | 3.316e -14   | 1.658e -13       | -30.344                | 0.081          |
| Null model (incl. RACE.f_6, RACE.f_2, RACE.f_8, RACE.f_4, RACE.f_3, OCCUPATION.f_10, OCCUPATION.f_2, OCCUPATION.f_3, OCCUPATION.f_11, OCCUPATION.f_6, OCCUPATION.f_5, OCCUPATION.f_7, OCCUPATION.f_8, OCCUPATION.f_9, OCCUPATION.f_4, political_2, political_6, political_4, political_5) | 0.333        | 2.836e -15   | 5.672e -15       | -33.496                | 0.052          |

*Note.* All models include RACE.f\_6, RACE.f\_2, RACE.f\_8, RACE.f\_4, RACE.f\_3, OCCUPATION.f\_10, OCCUPATION.f\_2, OCCUPATION.f\_3, OCCUPATION.f\_11, OCCUPATION.f\_6, OCCUPATION.f\_5, OCCUPATION.f\_7, OCCUPATION.f\_8, OCCUPATION.f\_9, OCCUPATION.f\_4, political\_2, political\_6, political\_4, political\_5.

## Posterior Summary

### Posterior Summaries of Coefficients

| Coefficient     | Mean          | SD           | P(incl)      | P(incl data) | Log(BF <sub>inclusion</sub> ) | 95% Credible Interval |               |
|-----------------|---------------|--------------|--------------|--------------|-------------------------------|-----------------------|---------------|
|                 |               |              |              |              |                               | Lower                 | Upper         |
| Intercept       | 21.369        | 0.184        | 1.000        | 1.000        | 0.000                         | 21.007                | 21.731        |
| <b>mfq_hc</b>   | <b>0.295</b>  | <b>0.035</b> | <b>0.500</b> | <b>1.000</b> | <b>30.955</b>                 | <b>0.227</b>          | <b>0.364</b>  |
| <b>mfq_igl</b>  | <b>-0.134</b> | <b>0.029</b> | <b>0.500</b> | <b>1.000</b> | <b>9.932</b>                  | <b>-0.191</b>         | <b>-0.077</b> |
| RACE.f_6        | -1.275        | 1.138        | 1.000        | 1.000        | 0.000                         | -3.515                | 0.964         |
| RACE.f_2        | -0.216        | 0.659        | 1.000        | 1.000        | 0.000                         | -1.513                | 1.080         |
| RACE.f_8        | -0.615        | 0.838        | 1.000        | 1.000        | 0.000                         | -2.263                | 1.033         |
| RACE.f_4        | 0.237         | 1.019        | 1.000        | 1.000        | 0.000                         | -1.767                | 2.242         |
| RACE.f_3        | 2.885         | 3.176        | 1.000        | 1.000        | 0.000                         | -3.363                | 9.132         |
| OCCUPATION.f_10 | 1.335         | 0.689        | 1.000        | 1.000        | 0.000                         | -0.020                | 2.690         |
| OCCUPATION.f_2  | 0.923         | 0.562        | 1.000        | 1.000        | 0.000                         | -0.183                | 2.029         |
| OCCUPATION.f_3  | -0.066        | 0.512        | 1.000        | 1.000        | 0.000                         | -1.073                | 0.941         |
| OCCUPATION.f_11 | 0.016         | 0.563        | 1.000        | 1.000        | 0.000                         | -1.092                | 1.124         |
| OCCUPATION.f_6  | 0.613         | 0.948        | 1.000        | 1.000        | 0.000                         | -1.251                | 2.477         |
| OCCUPATION.f_5  | -1.093        | 0.964        | 1.000        | 1.000        | 0.000                         | -2.988                | 0.803         |
| OCCUPATION.f_7  | -0.191        | 1.602        | 1.000        | 1.000        | 0.000                         | -3.343                | 2.962         |
| OCCUPATION.f_8  | -0.392        | 1.016        | 1.000        | 1.000        | 0.000                         | -2.391                | 1.608         |
| OCCUPATION.f_9  | 0.050         | 1.831        | 1.000        | 1.000        | 0.000                         | -3.552                | 3.653         |
| OCCUPATION.f_4  | 1.774         | 3.141        | 1.000        | 1.000        | 0.000                         | -4.406                | 7.954         |
| political_2     | 0.053         | 0.458        | 1.000        | 1.000        | 0.000                         | -0.848                | 0.954         |
| political_6     | -0.665        | 0.585        | 1.000        | 1.000        | 0.000                         | -1.816                | 0.485         |
| political_4     | 0.622         | 0.994        | 1.000        | 1.000        | 0.000                         | -1.334                | 2.578         |
| political_5     | 1.165         | 1.655        | 1.000        | 1.000        | 0.000                         | -2.092                | 4.421         |

# MIS SYM

## Model Comparison

| Models                                                                                                                                                                                                                                                                                    | P(M)         | P(M data)    | BF <sub>M</sub> | Log(BF <sub>10</sub> ) | R <sup>2</sup> |
|-------------------------------------------------------------------------------------------------------------------------------------------------------------------------------------------------------------------------------------------------------------------------------------------|--------------|--------------|-----------------|------------------------|----------------|
| <b>mfq_hc + mfq_igl + mfq_ps</b>                                                                                                                                                                                                                                                          | <b>0.250</b> | <b>0.766</b> | <b>9.823</b>    | <b>0.000</b>           | <b>0.193</b>   |
| mfq_hc + mfq_igl                                                                                                                                                                                                                                                                          | 0.083        | 0.108        | 1.336           | -0.857                 | 0.182          |
| mfq_igl + mfq_ps                                                                                                                                                                                                                                                                          | 0.083        | 0.083        | 0.992           | -1.127                 | 0.181          |
| mfq_igl                                                                                                                                                                                                                                                                                   | 0.083        | 0.039        | 0.442           | -1.889                 | 0.170          |
| mfq_hc + mfq_ps                                                                                                                                                                                                                                                                           | 0.083        | 0.004        | 0.042           | -4.212                 | 0.161          |
| mfq_ps                                                                                                                                                                                                                                                                                    | 0.083        | 5.069e-4     | 0.006           | -6.222                 | 0.142          |
| mfq_hc                                                                                                                                                                                                                                                                                    | 0.083        | 2.154e-8     | 2.369e-7        | -16.288                | 0.071          |
| Null model (incl. RACE.f_6, RACE.f_2, RACE.f_8, RACE.f_4, RACE.f_3, OCCUPATION.f_10, OCCUPATION.f_2, OCCUPATION.f_3, OCCUPATION.f_11, OCCUPATION.f_6, OCCUPATION.f_5, OCCUPATION.f_7, OCCUPATION.f_8, OCCUPATION.f_9, OCCUPATION.f_4, political_2, political_6, political_4, political_5) | 0.250        | 3.736e-9     | 1.121e-8        | -19.139                | 0.044          |

*Note.* All models include RACE.f\_6, RACE.f\_2, RACE.f\_8, RACE.f\_4, RACE.f\_3, OCCUPATION.f\_10, OCCUPATION.f\_2, OCCUPATION.f\_3, OCCUPATION.f\_11, OCCUPATION.f\_6, OCCUPATION.f\_5, OCCUPATION.f\_7, OCCUPATION.f\_8, OCCUPATION.f\_9, OCCUPATION.f\_4, political\_2, political\_6, political\_4, political\_5.

## Posterior Summary

### Posterior Summaries of Coefficients

| Coefficient     | Mean         | SD           | P(incl)      | P(incl data) | Log(BF <sub>inclusion</sub> ) | 95% Credible Interval |              |
|-----------------|--------------|--------------|--------------|--------------|-------------------------------|-----------------------|--------------|
|                 |              |              |              |              |                               | Lower                 | Upper        |
| Intercept       | 16.576       | 0.332        | 1.000        | 1.000        | 0.000                         | 15.923                | 17.229       |
| <b>mfq_hc</b>   | <b>0.122</b> | <b>0.061</b> | <b>0.500</b> | <b>0.878</b> | <b>1.975</b>                  | <b>0.001</b>          | <b>0.242</b> |
| <b>mfq_igl</b>  | <b>0.218</b> | <b>0.069</b> | <b>0.500</b> | <b>0.996</b> | <b>5.447</b>                  | <b>0.083</b>          | <b>0.353</b> |
| <b>mfq_ps</b>   | <b>0.092</b> | <b>0.050</b> | <b>0.500</b> | <b>0.853</b> | <b>1.759</b>                  | <b>-0.006</b>         | <b>0.189</b> |
| RACE.f_6        | 0.552        | 2.000        | 1.000        | 1.000        | 0.000                         | -3.384                | 4.487        |
| RACE.f_2        | 1.728        | 1.161        | 1.000        | 1.000        | 0.000                         | -0.557                | 4.012        |
| RACE.f_8        | 1.991        | 1.471        | 1.000        | 1.000        | 0.000                         | -0.904                | 4.885        |
| RACE.f_4        | -0.882       | 1.798        | 1.000        | 1.000        | 0.000                         | -4.419                | 2.655        |
| RACE.f_3        | 2.180        | 5.617        | 1.000        | 1.000        | 0.000                         | -8.870                | 13.229       |
| OCCUPATION.f_10 | -0.261       | 1.211        | 1.000        | 1.000        | 0.000                         | -2.643                | 2.122        |
| OCCUPATION.f_2  | -0.882       | 0.989        | 1.000        | 1.000        | 0.000                         | -2.828                | 1.064        |
| OCCUPATION.f_3  | -0.688       | 0.900        | 1.000        | 1.000        | 0.000                         | -2.459                | 1.083        |
| OCCUPATION.f_11 | -1.650       | 0.989        | 1.000        | 1.000        | 0.000                         | -3.596                | 0.295        |
| OCCUPATION.f_6  | -0.889       | 1.671        | 1.000        | 1.000        | 0.000                         | -4.176                | 2.398        |
| OCCUPATION.f_5  | -1.162       | 1.693        | 1.000        | 1.000        | 0.000                         | -4.493                | 2.169        |
| OCCUPATION.f_7  | -0.212       | 2.818        | 1.000        | 1.000        | 0.000                         | -5.755                | 5.331        |
| OCCUPATION.f_8  | -1.339       | 1.786        | 1.000        | 1.000        | 0.000                         | -4.852                | 2.175        |
| OCCUPATION.f_9  | -0.050       | 3.218        | 1.000        | 1.000        | 0.000                         | -6.381                | 6.282        |
| OCCUPATION.f_4  | 3.570        | 5.521        | 1.000        | 1.000        | 0.000                         | -7.293                | 14.432       |
| political_2     | -0.933       | 0.804        | 1.000        | 1.000        | 0.000                         | -2.515                | 0.649        |
| political_6     | -0.889       | 1.028        | 1.000        | 1.000        | 0.000                         | -2.911                | 1.133        |

|             |        |       |       |       |       |        |       |
|-------------|--------|-------|-------|-------|-------|--------|-------|
| political_4 | 0.371  | 1.749 | 1.000 | 1.000 | 0.000 | -3.070 | 3.811 |
| political_5 | -1.134 | 2.909 | 1.000 | 1.000 | 0.000 | -6.857 | 4.589 |

---
